# Supplementary material for: Who are the important predators of sea turtle nests at Wreck Rock beach?
Source: PeerJ. 2017 Jun 30;5:e3515. doi: 10.7717/peerj.3515 (PMC5494172; doi:10.7717/peerj.3515)
Supplement: Supplemental Information 2 [file peerj-05-3515-s002.xlsx]

## Sheet: Sheet1
Camera trap data for 2014-2015 nesting season
Nest location peg number	Nest Number (Turtle tag ID)	Predator species	Date	Appearance Time
31-32	K77290	V. panoptes	2015-01-17	08:13:00
33-34	QA45120	V. panoptes	2015-01-23	14:11:00
33-34	QA45120	V. panoptes	2015-01-24	10:59:00
33-34	QA45120	V. panoptes	2015-01-24	11:39:00
33-34	QA45120	V. panoptes	2015-01-24	11:45:00
33-34	QA45120	V. panoptes	2015-01-24	13:32:00
33-34	QA45120	V. panoptes	2015-01-25	08:14:00
33-34	QA45120	V. panoptes	2015-01-25	09:32:00
33-34	QA45120	V. panoptes	2015-01-26	07:46:00
33-34	QA45120	V. panoptes	2015-01-26	08:58:00
33-34	QA45120	V. panoptes	2015-01-26	13:07:00
33-34	QA45120	V. panoptes	2015-01-26	13:39:00
33-34	QA45120	V. panoptes	2015-01-27	07:51:00
33-34	QA45120	V. panoptes	2015-01-27	13:22:00
35-36	QA45007	V. panoptes	2015-01-07	08:52:00
38-39	K90312	V. panoptes	2015-01-06	10:37:00
38-39	K90312	V. panoptes	2015-01-07	08:53:00
38-39	K77224	V. panoptes	2015-01-25	07:48:00
40-41	QA2361	V. panoptes	2015-01-14	15:29:00
70-71	K34755	V. panoptes	2015-01-12	09:38:00
70-71	K34755	V. panoptes	2015-01-13	13:25:00
70-71	K34755	V. panoptes	2015-01-21	09:56:00
70-71	K34755	V. panoptes	2015-01-25	11:45:00
86-87	T22728	V. panoptes	2015-01-11	14:06:00
90-91	QA45046	V. panoptes	2015-01-17	08:51:00
93-94	K67674	V. panoptes	2015-01-02	15:56:00
93-94	K67674	V. panoptes	2015-01-04	13:18:00
93-94	QA45041	V. panoptes	2014-12-25	16:05:00
93-94	QA45041	V. panoptes	2015-01-01	14:51:00
93-94	QA45041	V. panoptes	2015-01-02	15:59:00
93-94	QA45041	V. panoptes	2015-01-15	10:02:00
93-94	QA45041	V. panoptes	2015-01-25	12:55:00
33-34	QA45120	V. panoptes	2015-01-24	09:06:00
33-34	QA45120	V. panoptes	2015-01-26	10:47:00
33-34	QA45120	V. panoptes	2015-01-26	11:49:00
33-34	QA45120	V. panoptes	2015-01-26	12:40:00
33-34	QA45120	V. panoptes	2015-01-27	10:31:00
35-36	QA45007	V. panoptes	2014-12-19	11:53:00
35-36	QA45007	V. panoptes	2015-01-06	12:46:00
35-36	QA45007	V. panoptes	2015-01-06	14:19:00
38-39	K90312	V. panoptes	2015-01-07	08:47:00
38-39	K97736	V. panoptes	2015-01-17	07:12:00
33-34	QA45120	V. panoptes	2015-01-19	08:50:00
33-34	QA45120	V. panoptes	2015-01-23	09:23:00
33-34	QA45120	V. panoptes	2015-01-23	10:58:00
33-34	QA45120	V. panoptes	2015-01-24	09:31:00
33-34	QA45120	V. panoptes	2015-01-27	12:25:00
33-34	QA45120	V. varius	2015-01-24	13:53:00
33-34	QA45120	V. varius	2015-01-24	14:38:00
33-34	QA45120	V. varius	2015-01-27	11:48:00
33-34	QA45120	V. varius	2015-01-27	14:18:00
35-36	QA45007	V. varius	2015-01-06	10:37:00
35-36	QA45007	V. varius	2015-01-06	11:06:00
38-39	K77224	V. varius	2015-01-18	15:59:00
40-41	QA2361	V. varius	2015-01-13	12:22:00
