# Supplementary material for: Who are the important predators of sea turtle nests at Wreck Rock beach?
Source: PeerJ. 2017 Jun 30;5:e3515. doi: 10.7717/peerj.3515 (PMC5494172; doi:10.7717/peerj.3515)
Supplement: Supplemental Information 6 [file peerj-05-3515-s006.xlsx]

## Sheet: Sheet1
Tracking plot data 2014-2015 nesting season. Number of tracks recorded per 1 x 2 m sand plot
		number of	number of	number of
Date	Peg location on beach	small goanna tracks	adult goanna tracks	fox tracks
2014-12-05	54		1
	55		1	1
	56
	57
	58
	59
	60	1
	61
	62
	63	1
	64
	65
	66
	67
	68
	69
	70
	71
	72
	73
	74
Date	Sector No	small goanna	adult goanna	fox
2014-12-06	54
	55
	56
	57
	58
	59
	60
	61
	62
	63
	64
	65
	66
	67
	68
	69
	70
	71
	72
	73
	74
Date	Sector No	small goanna	adult goanna	fox
2014-12-07	54
	55
	56
	57
	58
	59
	60
	61
	62
	63
	64
	65
	66
	67
	68		1
	69
	70
	71
	72
	73
	74
Date	Sector No	small goanna	adult goanna	fox
2014-12-08	54		1
	55
	56
	57
	58
	59
	60
	61
	62
	63			1
	64
	65
	66
	67
	68
	69
	70		1
	71
	72
	73
	74
Date	Sector No	small goanna	adult goanna	fox
2014-12-09	54
	55
	56
	57
	58
	59
	60
	61
	62
	63
	64
	65
	66
	67
	68
	69		1
	70
	71
	72	1
	73	1
	74
Date	Sector No	small goanna	adult goanna	fox
2014-12-10	54	1
	55		1	1
	56
	57
	58	1	2
	59
	60
	61
	62
	63
	64
	65	1
	66
	67
	68		1
	69		1
	70
	71
	72		1
	73
	74		1
Date	Sector No	small goanna	adult goanna	fox
2014-12-11	54
	55
	56
	57		1
	58	1
	59		1
	60
	61
	62
	63
	64
	65	1
	66
	67
	68		1
	69
	70		1
	71
	72		1
	73	1
	74
Date	Sector No	small goanna	adult goanna	fox
2014-12-12	54
	55
	56
	57
	58
	59		1
	60
	61
	62
	63
	64
	65
	66
	67
	68	1
	69
	70
	71
	72		3
	73
	74
Date	Sector No	small goanna	adult goanna	fox
2014-12-14	54
	55
	56
	57
	58
	59			1
	60		1
	61
	62
	63
	64
	65
	66
	67
	68
	69
	70
	71
	72	1
	73		1
	74
Date	Sector No	small goanna	adult goanna	fox
2014-12-15	54		1
	55		1
	56
	57
	58
	59
	60
	61
	62		1
	63		1
	64
	65	1
	66	1
	67
	68
	69
	70
	71		1
	72
	73
	74	1
Date	Sector No	small goanna	adult goanna	fox
2014-12-16	54
	55
	56
	57
	58
	59
	60		1
	61
	62
	63
	64
	65	1
	66
	67
	68
	69
	70
	71		1
	72
	73
	74
Date	Sector No	small goanna	adult goanna	fox
2014-12-17	54		1
	55		1
	56
	57
	58
	59
	60		1
	61
	62
	63
	64		1
	65
	66
	67
	68
	69
	70
	71
	72	1
	73
	74
Date	Sector No	small goanna	adult goanna	fox
2014-12-18	54
	55
	56		1
	57		1
	58		1
	59
	60		1
	61
	62		1
	63
	64			1
	65
	66
	67
	68		1
	69	1
	70
	71	1
	72
	73	2
	74
Date	Sector No	small goanna	adult goanna	fox
2014-12-19	54		1
	55
	56
	57
	58	1
	59
	60
	61
	62
	63
	64
	65
	66
	67
	68		1
	69
	70		2
	71
	72
	73	1
	74	1
Date	Sector No	small goanna	adult goanna	fox
2014-12-20	54
	55		2
	56
	57
	58		1
	59
	60
	61		1
	62		2
	63		1
	64
	65	1
	66
	67
	68		1
	69		1
	70	1
	71
	72
	73		1
	74
Date	Sector No	small goanna	adult goanna	fox
2014-12-21	54		1
	55
	56
	57
	58	1
	59	1
	60
	61
	62
	63		1
	64
	65	1
	66
	67
	68
	69
	70
	71
	72
	73		1
	74		4
Date	Sector No	small goanna	adult goanna	fox
2014-12-22	54
	55
	56
	57
	58		1
	59
	60
	61
	62		1
	63	2
	64
	65	2
	66
	67
	68	1
	69	1
	70
	71
	72
	73
	74		1
Date	Sector No	small goanna	adult goanna	fox
2014-12-23	54
	55		1
	56
	57	1
	58		1
	59
	60
	61
	62
	63
	64
	65
	66
	67
	68
	69
	70
	71
	72
	73		1
	74
Date	Sector No	small goanna	adult goanna	fox
2014-12-24	54
	55		1
	56		1
	57
	58		1
	59		2
	60		1
	61
	62
	63
	64
	65	2
	66	1
	67
	68
	69
	70
	71		1
	72
	73		1
	74
Date	Sector No	small goanna	adult goanna	fox
2014-12-25	54
	55
	56
	57		1
	58		2
	59		2
	60
	61		2
	62
	63		1
	64
	65
	66
	67
	68	1	1
	69
	70		1
	71	1
	72	1
	73		1
	74		1
Date	Sector No	small goanna	adult goanna	fox
2014-12-26	54
	55
	56
	57
	58		1
	59
	60
	61
	62
	63
	64
	65
	66
	67		2
	68	1
	69
	70
	71
	72
	73
	74	1
Date	Sector No	small goanna	adult goanna	fox
2014-12-27	54
	55	1
	56
	57	1	1
	58		1
	59
	60
	61
	62
	63
	64
	65
	66
	67
	68
	69
	70
	71
	72
	73
	74
Date	Sector No	small goanna	adult goanna	fox
2014-12-28	54
	55
	56		1
	57		2
	58		1
	59
	60		2
	61
	62
	63
	64
	65
	66
	67
	68		1
	69
	70
	71
	72
	73
	74
Date	Sector No	small goanna	adult goanna	fox
2014-12-29	54
	55
	56
	57	1
	58
	59
	60		1
	61
	62		3
	63
	64
	65	3
	66
	67		2
	68
	69		1
	70
	71
	72
	73		1
	74		1
Date	Sector No	small goanna	adult goanna	fox
2014-12-31	54
	55	1
	56
	57
	58	2	2
	59		1
	60
	61
	62		1
	63
	64
	65
	66
	67			1
	68
	69	1
	70
	71
	72
	73
	74
Date	Sector No	small goanna	adult goanna	fox
2015-01-01	54
	55		1
	56		1
	57
	58		4
	59	1
	60		1
	61
	62		1
	63		2
	64	1
	65	2
	66
	67
	68
	69
	70	1
	71
	72
	73
	74	2
Date	Sector No	small goanna	adult goanna	fox
2015-01-02	54	1
	55
	56
	57
	58		2
	59
	60
	61
	62
	63	1
	64	1
	65	2
	66
	67
	68
	69		1
	70
	71
	72
	73
	74
Date	Sector No	small goanna	adult goanna	fox
2015-01-03	54		1
	55			1
	56
	57
	58		1
	59
	60		1
	61
	62
	63
	64
	65		1
	66
	67		1
	68
	69
	70
	71
	72
	73
	74
Date	Sector No	small goanna	adult goanna	fox
2015-01-04	54
	55
	56
	57
	58
	59
	60
	61
	62
	63
	64
	65
	66
	67
	68
	69
	70
	71
	72
	73		1
	74
Date	Sector No	small goanna	adult goanna	fox
2015-01-05	54
	55
	56
	57		1
	58
	59
	60	1
	61
	62		1
	63	1
	64
	65
	66
	67
	68
	69
	70
	71
	72
	73		1
	74
Date	Sector No	small goanna	adult goanna	fox
2015-01-06	54		1
	55
	56
	57
	58
	59
	60
	61
	62
	63
	64
	65
	66
	67
	68
	69
	70
	71
	72
	73		1
	74
Date	Sector No	small goanna	adult goanna	fox
2015-01-08	54
	55		1
	56
	57
	58
	59
	60
	61
	62	1
	63
	64
	65
	66
	67
	68	1
	69
	70		1
	71
	72
	73		1
	74
Date	Sector No	small goanna	adult goanna	fox
2015-01-09	54
	55		1
	56
	57
	58
	59
	60
	61
	62
	63
	64
	65	1
	66
	67
	68
	69
	70
	71
	72
	73		1
	74
Date	Sector No	small goanna	adult goanna	fox
2015-01-10	54
	55		2
	56		2
	57		1
	58		2
	59	1	1
	60
	61	1
	62
	63
	64
	65
	66	1
	67
	68
	69
	70		2
	71
	72
	73
	74
Date	Sector No	small goanna	adult goanna	fox
2015-01-11	54
	55
	56
	57
	58		1
	59
	60
	61
	62
	63		1
	64
	65	2
	66
	67
	68
	69
	70		1
	71
	72
	73
	74
Date	Sector No	small goanna	adult goanna	fox
2015-01-12	54
	55
	56
	57		1
	58		1
	59
	60
	61		1
	62
	63
	64		1
	65
	66
	67		1
	68		1
	69
	70
	71
	72
	73
	74		1
Date	Sector No	small goanna	adult goanna	fox
2015-01-13	54
	55
	56		1
	57
	58
	59
	60
	61
	62
	63
	64
	65
	66
	67
	68
	69		1
	70
	71		1
	72
	73		1
	74		1
Date	Sector No	small goanna	adult goanna	fox
2015-01-14	54
	55
	56
	57
	58
	59
	60
	61
	62
	63
	64
	65
	66	1
	67
	68		1
	69
	70
	71
	72
	73
	74
Date	Sector No	small goanna	adult goanna	fox
2015-01-15	54
	55		1
	56
	57
	58		1
	59
	60
	61
	62	1
	63
	64
	65
	66
	67
	68
	69
	70
	71	1
	72	1	1
	73
	74
Date	Sector No	small goanna	adult goanna	fox
2015-01-16	54
	55
	56
	57
	58
	59
	60
	61
	62
	63
	64
	65
	66
	67	1
	68
	69
	70
	71
	72
	73		1
	74
Date	Sector No	small goanna	adult goanna	fox
2015-01-17	54	1
	55		1
	56
	57		1
	58
	59
	60
	61	1
	62
	63
	64
	65
	66
	67
	68
	69
	70
	71
	72
	73
	74
Date	Sector No	small goanna	adult goanna	fox
2015-01-18	54		1
	55
	56	1
	57		1
	58
	59
	60	1
	61
	62
	63
	64
	65	1	1
	66
	67
	68	2
	69
	70
	71			1
	72	1
	73	1
	74		1
Date	Sector No	small goanna	adult goanna	fox
2015-01-19	54
	55
	56
	57
	58
	59
	60
	61
	62
	63	1
	64
	65	1
	66
	67
	68
	69
	70
	71
	72		2
	73
	74
Date	Sector No	small goanna	adult goanna	fox
2015-01-20	54
	55
	56
	57
	58
	59
	60
	61
	62
	63
	64
	65
	66
	67
	68
	69
	70
	71
	72
	73
	74
Date	Sector No	small goanna	adult goanna	fox
2015-01-21	54
	55
	56
	57
	58
	59
	60
	61
	62
	63
	64
	65
	66
	67
	68
	69
	70
	71
	72
	73
	74
Date	Sector No	small goanna	adult goanna	fox
2015-01-23	54	1
	55
	56	1
	57
	58	1
	59
	60
	61
	62
	63
	64
	65
	66
	67
	68
	69		1
	70
	71		1
	72	1
	73
	74
Date	Sector No	small goanna	adult goanna	fox
2015-01-24	54		2
	55		1
	56
	57
	58	1
	59
	60
	61
	62		1
	63		1
	64
	65
	66
	67	1
	68
	69
	70
	71
	72
	73	1
	74
Date	Sector No	small goanna	adult goanna	fox
2015-01-25	54
	55
	56		1
	57
	58		1
	59	1
	60
	61
	62		1
	63
	64
	65
	66
	67
	68
	69	1	1
	70
	71
	72
	73
	74
Date	Sector No	small goanna	adult goanna	fox
2015-01-26	54		1
	55
	56
	57
	58
	59		1
	60
	61
	62		1
	63
	64
	65
	66
	67
	68		1
	69	1
	70		1
	71		1
	72
	73		1
	74
Date	Sector No	small goanna	adult goanna	fox
2015-01-27	54
	55
	56
	57
	58		1
	59
	60
	61		1
	62
	63
	64
	65
	66
	67
	68		3
	69		1
	70		1
	71
	72		2	1
	73		2
	74
Date	Sector No	small goanna	adult goanna	fox
2015-01-28	54
	55
	56
	57
	58
	59
	60
	61
	62		1
	63	1
	64
	65	1
	66
	67
	68		1
	69
	70
	71		1	1
	72
	73
	74		1	1
Date	Sector No	small goanna	adult goanna	fox
2015-01-29	54
	55
	56
	57
	58
	59
	60
	61
	62
	63
	64
	65
	66
	67
	68
	69
	70
	71
	72
	73	1
	74			1
Date	Sector No	small goanna	adult goanna	fox
2015-01-31	54			1
	55		2
	56		1
	57		1
	58
	59		1	1
	60
	61
	62
	63
	64
	65
	66
	67			1
	68	1
	69
	70	2
	71
	72		1	1
	73
	74		1	1
Date	Sector No	small goanna	adult goanna	fox
2015-02-01	54		1
	55		1
	56		1
	57
	58		1
	59
	60		1
	61		1
	62
	63
	64
	65
	66			2
	67
	68			1
	69
	70
	71
	72
	73	1	1
	74		1
Date	Sector No	small goanna	adult goanna	fox
2015-02-02	54
	55
	56			1
	57		1
	58
	59	1
	60
	61			1
	62
	63	1
	64
	65
	66
	67	1	1
	68		1
	69	1
	70
	71
	72		2
	73		2
	74		4
Date	Sector No	small goanna	adult goanna	fox
2015-02-03	54		2
	55		1
	56
	57
	58
	59
	60
	61
	62		1
	63		1
	64
	65
	66
	67
	68
	69
	70
	71
	72
	73
	74
Date	Sector No	small goanna	adult goanna	fox
2015-02-06	54		1
	55
	56
	57
	58
	59
	60		1	1
	61
	62		1	1
	63
	64
	65
	66
	67		1	1
	68
	69
	70
	71
	72
	73
	74
Date	Sector No	small goanna	adult goanna	fox
2015-02-08	54
	55
	56
	57		1
	58
	59
	60		1
	61
	62		1
	63
	64
	65
	66
	67		1
	68
	69
	70		1
	71		1
	72
	73
	74
Date	Sector No	small goanna	adult goanna	fox
2015-02-09	54		1
	55		1
	56		1	1
	57		1
	58		1	1
	59		1
	60
	61			1
	62		1
	63		1	1
	64		1
	65
	66
	67
	68		1
	69		1
	70		1
	71		1
	72		1
	73		1
	74		1
Date	Sector No	small goanna	adult goanna	fox
2015-02-10	54
	55		1
	56		1	1
	57		1
	58		1
	59
	60
	61		1
	62		1
	63		1
	64		1
	65
	66
	67
	68		1
	69
	70		1
	71		1
	72
	73
	74		1
Date	Sector No	small goanna	adult goanna	fox
2015-02-11	54
	55
	56
	57
	58
	59
	60
	61
	62
	63
	64
	65
	66
	67
	68
	69		1
	70
	71
	72
	73
	74
Date	Sector No	small goanna	adult goanna	fox
2015-02-12	54
	55			1
	56
	57
	58
	59
	60
	61
	62		1
	63
	64
	65
	66
	67
	68
	69
	70
	71
	72
	73
	74			1
Date	Sector No	small goanna	adult goanna	fox
2015-02-13	54
	55
	56
	57		1
	58		1
	59
	60		2
	61		1
	62
	63		2
	64		1
	65
	66
	67
	68
	69
	70
	71
	72
	73
	74
Date	Sector No	small goanna	adult goanna	fox
2015-02-15	54
	55
	56
	57
	58
	59
	60
	61
	62
	63
	64
	65
	66
	67
	68
	69
	70
	71
	72		1
	73			1
	74
Date	Sector No	small goanna	adult goanna	fox
2015-02-25	54		1
	55
	56	1	1
	57	1
	58	2		1
	59
	60	2		1
	61	2
	62		1	1
	63
	64	1		2
	65
	66
	67	1		1
	68	1	1
	69
	70
	71
	72		1
	73	1	2
	74	1	2	1
Date	Sector No	small goanna	adult goanna	fox
2015-02-26	54
	55
	56
	57
	58
	59
	60	1
	61
	62
	63		1
	64
	65
	66
	67
	68
	69			1
	70
	71			1
	72			1
	73	1
	74			1
Date	Sector No	small goanna	adult goanna	fox
2015-02-27	54			1
	55
	56
	57		1
	58		1
	59		1
	60		1
	61
	62
	63		1
	64			1
	65
	66
	67
	68		1
	69		1
	70			1
	71			1
	72			1
	73
	74
Date	Sector No	small goanna	adult goanna	fox
2015-02-28	54
	55			1
	56
	57
	58		1
	59		1
	60
	61		1
	62
	63
	64
	65
	66
	67
	68			1
	69		1
	70		1
	71		1
	72
	73
	74
Date	Sector No	small goanna	adult goanna	fox
2015-03-01	54
	55		1
	56
	57
	58
	59
	60
	61
	62
	63
	64		1
	65
	66
	67
	68		1
	69
	70
	71
	72
	73
	74			1
Date	Sector No	small goanna	adult goanna	fox
2015-03-03	54		1
	55
	56		1
	57
	58		2
	59	1
	60
	61		1
	62	1		1
	63	1		1
	64		2
	65
	66
	67
	68
	69
	70
	71
	72
	73
	74
Date	Sector No	small goanna	adult goanna	fox
2015-03-04	54
	55
	56
	57
	58
	59	1
	60
	61
	62
	63
	64
	65
	66
	67
	68	1	2
	69			4
	70		1	2
	71			1
	72		1	1
	73	1	2
	74
