# Supplementary material for: Who are the important predators of sea turtle nests at Wreck Rock beach?
Source: PeerJ. 2017 Jun 30;5:e3515. doi: 10.7717/peerj.3515 (PMC5494172; doi:10.7717/peerj.3515)
Supplement: Supplemental Information 7 [file peerj-05-3515-s007.xlsx]

## Sheet: Sheet1
Tracking plot data 2014-2015 nesting season. Number of tracks recorded per 1 x 2 m sand plot
			number of	number of	number of
Date	Peg location on beach	Time	small goanna tracks	adult goanna tracks	fox tracks
2015-11-30	44	03:55:00
	45	03:58:00		1
	46	04:02:00
	47	04:04:00
	48	04:07:00
	49	04:10:00
	50	04:14:00
	51	04:18:00
	52	04:20:00
	53	04:24:00	1
	54	04:27:00
	55	04:31:00
	56	04:35:00
	57	04:38:00
	58	04:42:00
	58A	04:45:00		1
	59	04:50:00
	60	04:53:00
	61	04:55:00
	62	04:59:00	1
	63	05:03:00
	64	05:06:00
	65	05:08:00
	66	05:12:00
	67	05:15:00
	68	05:17:00
	69	05:20:00
	70	05:25:00
	71	05:21:00
	72	05:15:00
	73	05:12:00
	74	05:10:00
	75	05:07:00
	76	05:04:00
	77	05:02:00
	78	04:58:00
	79	04:54:00
	80	04:52:00
	81	04:50:00
	82	04:47:00
	83	04:45:00
	84	04:43:00		1
2015-12-01	44
	45
	46
	47
	48
	49
	50
	51
	52
	53
	54	04:08:00
	55	04:12:00		1
	56	04:17:00			1
	57	04:22:00
	58	04:24:00
	58A	04:25:00
	59	04:26:00
	60	04:27:00
	61	04:30:00
	62	04:32:00
	63	04:35:00			1
	64	04:37:00
	65	04:40:00
	66	04:44:00		1
	67	04:50:00
	68	04:52:00
	69	04:55:00
	70	04:58:00
	71	05:00:00
	72	05:02:00
	73	05:04:00
	74	05:07:00
	75	05:10:00
	76	05:14:00
	77	05:44:00	1
	78	05:40:00
	79	05:36:00			1
	80	05:34:00
	81	05:34:00
	82	05:29:00
	83	05:27:00
	84	05:24:00
2015-12-02	44	03:15:00	1
	45	03:17:00
	46	03:20:00
	47	03:23:00
	48	03:25:00
	49	03:28:00
	50	03:32:00
	51	03:35:00
	52	03:38:00
	53	03:41:00	1
	54	03:45:00			1
	55	03:50:00
	56	03:56:00
	57	04:00:00	1
	58	04:02:00
	58A	04:03:00	1
	59	04:05:00
	60	04:07:00
	61	04:10:00
	62	04:13:00
	63	04:16:00
	64	04:19:00			1
	65	03:13:00
	66	03:15:00	1
	67	03:17:00
	68	03:20:00
	69	03:22:00
	70	03:24:00
	71	03:26:00
	72	03:29:00
	73	03:31:00
	74	03:34:00
	75	03:37:00	1
	76	03:40:00
	77	03:41:00
	78	03:44:00
	79	03:47:00
	80	03:50:00
	81	03:53:00		1
	82	03:55:00		1
	83	03:58:00
	84	04:00:00
2015-12-03	44	04:15:00
	45	04:17:00
	46	04:20:00
	47	04:22:00
	48	04:24:00
	49	04:26:00
	50	04:30:00
	51	04:32:00
	52	04:35:00
	53	04:38:00
	54	04:40:00
	55	04:45:00
	56	04:47:00
	57	04:50:00
	58	04:53:00
	58A	04:54:00	1
	59	04:55:00
	60	04:57:00
	61	04:59:00
	62	05:02:00
	63	05:05:00
	64	05:08:00
	65	04:06:00
	66
	67
	68
	69
	70
	71
	72
	73
	74
	75
	76
	77
	78
	79
	80
	81
	82
	83
	84
2015-12-04	44	03:28:00
	45	03:31:00
	46	03:34:00
	47	03:36:00
	48	03:39:00
	49	03:41:00
	50	03:43:00
	51	03:47:00
	52	03:50:00
	53	03:54:00
	54	03:56:00
	55	03:59:00
	56	04:03:00
	57	04:06:00
	58	04:08:00
	58A	04:10:00
	59	04:12:00
	60	04:15:00
	61	04:17:00
	62	04:20:00
	63	04:22:00
	64	04:25:00
	65	03:22:00
	66	03:25:00	1
	67	03:27:00	1
	68	03:30:00
	69	03:32:00
	70	03:35:00
	71	03:37:00
	72	03:40:00
	73	03:43:00
	74	03:46:00			1
	75	03:49:00
	76	03:53:00
	77	03:58:00
	78	04:00:00
	79	04:03:00
	80	04:06:00
	81	04:09:00
	82	04:12:00
	83	04:15:00	1		1
	84	04:18:00
2015-12-05	44	03:43:00	2
	45	03:45:00
	46	03:48:00
	47	03:50:00
	48	03:53:00
	49	03:56:00		1
	50	03:59:00
	51	04:02:00
	52	04:04:00		1
	53	04:07:00
	54	04:10:00
	55	04:13:00
	56	04:20:00
	57	04:23:00
	58	04:25:00		1
	58A	04:28:00		1
	59	04:30:00
	60	04:34:00
	61	04:39:00
	62	04:41:00
	63	04:43:00
	64	04:47:00
	65	04:51:00		1
	66	04:54:00
	67	04:55:00
	68	04:58:00
	69	05:00:00
	70	05:02:00
	71	05:04:00
	72	05:06:00
	73	05:04:00
	74	04:59:00
	75	04:57:00
	76	04:55:00		1
	77	04:52:00
	78	04:50:00			1
	79	04:47:00			1
	80	04:39:00			1
	81	04:38:00
	82	04:36:00
	83	04:32:00
	84	04:30:00
2015-12-06	44	03:29:00
	45	03:32:00
	46	03:34:00
	47	03:36:00
	48	03:38:00
	49	03:40:00
	50	03:42:00
	51	03:44:00
	52	03:46:00
	53	03:48:00
	54	03:50:00
	55	03:52:00
	56	04:03:00
	57	04:06:00
	58	04:08:00	1
	58A	04:10:00
	59	04:13:00
	60	04:15:00
	61	04:18:00
	62	04:20:00	1	1
	63	04:24:00
	64	04:25:00
	65	04:30:00
	66	04:33:00
	67	04:34:00
	68	04:36:00
	69	04:39:00
	70	04:41:00
	71	04:43:00
	72	04:45:00
	73	04:47:00			1
	74	04:42:00
	75	04:40:00
	76	04:38:00	1
	77	04:33:00
	78	04:31:00
	79	04:30:00			1
	80	04:28:00
	81	04:26:00
	82	04:23:00			1
	83	04:21:00
	84	04:17:00
2015-12-07	44	03:17:00
	45	03:19:00	1
	46	03:21:00
	47	03:23:00
	48	03:25:00
	49	03:28:00	1
	50	03:30:00		1
	51	03:34:00
	52	03:35:00
	53	03:38:00
	54	03:40:00
	55	03:48:00
	56	03:51:00
	57	03:53:00
	58	03:55:00
	58A	03:58:00
	59	04:01:00
	60	04:03:00
	61	04:06:00
	62	04:08:00
	63	04:10:00
	64	04:21:00
	65	04:25:00
	66	04:27:00
	67	04:27:00
	68	04:26:00
	69	04:24:00
	70	04:23:00
	71	04:20:00
	72	04:18:00
	73	04:17:00
	74	04:15:00			1
	75	04:14:00
	76	04:12:00
	77	04:10:00	1
	78	04:08:00
	79	04:06:00
	80	04:04:00
	81	04:03:00
	82	04:01:00
	83	03:58:00
	84	03:55:00
2015-12-08	44	03:42:00
	45	03:44:00
	46	03:47:00
	47	03:48:00
	48	03:50:00
	49	03:52:00
	50	03:55:00
	51	03:57:00
	52	03:59:00
	53	04:01:00
	54	04:03:00
	55	04:05:00
	56	04:08:00
	57	04:11:00
	58	04:13:00
	58A	04:14:00
	59	04:16:00
	60	04:18:00
	61	04:20:00
	62	04:22:00
	63	04:24:00
	64	04:26:00
	65	04:29:00
	66	04:32:00
	67	04:34:00
	68	04:36:00
	69	04:38:00
	70	04:40:00
	71	04:42:00
	72	04:38:00
	73	04:36:00
	74	04:34:00
	75	04:32:00
	76	04:30:00		1
	77	04:28:00
	78	04:26:00
	79	04:24:00
	80	04:22:00
	81	04:20:00
	82	04:18:00
	83	04:15:00
	84	04:12:00
2015-12-09	44	03:44:00
	45	03:46:00
	46	03:49:00
	47	03:51:00
	48	03:56:00
	49	03:58:00
	50	04:00:00
	51	04:02:00
	52	04:04:00
	53	04:06:00
	54	04:08:00
	55	04:11:00
	56	04:14:00
	57	04:16:00
	58	04:18:00	1
	58A	04:24:00
	59	04:30:00
	60	04:32:00
	61	04:34:00
	62	04:36:00
	63	04:38:00
	64	04:40:00
	65	04:45:00
	66	04:47:00
	67	04:49:00
	68	04:51:00
	69	04:53:00
	70	04:55:00
	71	04:57:00
	72	04:59:00
	73	05:01:00
	74	05:04:00
	75	05:07:00
	76	05:09:00
	77	05:11:00
	78	05:10:00
	79	05:08:00
	80	05:06:00
	81	05:04:00
	82	05:02:00
	83	05:00:00
	84	04:56:00
2015-12-10	44	03:43:00
	45	03:45:00
	46	03:47:00
	47	03:49:00
	48	03:51:00
	49	03:53:00
	50	03:56:00
	51	03:58:00
	52	04:00:00
	53	04:03:00		1
	54	04:05:00
	55	04:10:00
	56	04:13:00
	57	04:15:00
	58	04:17:00
	58A	04:20:00
	59	04:21:00
	60	04:23:00
	61	04:26:00
	62	04:28:00		1
	63	04:31:00
	64	04:33:00
	65	04:36:00
	66	04:39:00
	67	04:41:00		1
	68	04:43:00
	69	04:45:00
	70	04:47:00
	71	04:50:00
	72	04:48:00
	73	04:44:00
	74	04:42:00
	75	04:40:00			1
	76	04:38:00	1
	77	04:36:00
	78	04:34:00
	79	04:32:00			1
	80	04:30:00
	81	04:28:00
	82	04:23:00
	83	04:21:00
	84	04:19:00
2015-12-11	44	03:48:00			1
	45	03:51:00
	46	03:53:00
	47	03:55:00
	48	03:57:00
	49	03:59:00
	50	04:02:00
	51	04:04:00
	52	04:07:00
	53	04:09:00	1
	54	04:11:00
	55	04:17:00
	56	04:20:00
	57	04:21:00
	58	04:23:00		1
	58A	04:24:00		1
	59	04:25:00
	60	04:27:00
	61	04:31:00
	62	04:33:00
	63	04:35:00
	64	04:38:00			1
	65	04:41:00
	66	04:43:00
	67	04:45:00
	68	04:47:00
	69	04:49:00
	70	04:52:00
	71	04:53:00
	72	04:54:00
	73	04:55:00
	74	04:53:00			1
	75	04:51:00
	76	04:49:00
	77	04:48:00
	78	04:45:00
	79	04:43:00			1
	80	04:41:00
	81	04:40:00
	82	04:38:00
	83	04:36:00
	84	04:33:00		1
2015-12-13	44	04:15:00
	45	04:17:00
	46	04:19:00	1
	47	04:21:00
	48	04:23:00
	49	04:28:00
	50	04:30:00
	51	04:33:00
	52	04:35:00
	53	04:37:00
	54	04:39:00
	55	04:42:00
	56	04:44:00
	57	04:46:00
	58	04:48:00
	58A	04:50:00
	59	04:51:00
	60	04:54:00		1	1
	61	04:56:00	1
	62	04:58:00
	63	05:00:00
	64	05:02:00
	65	05:06:00
	66	05:09:00
	67	05:10:00
	68	05:12:00
	69	05:14:00
	70	05:16:00
	71	05:18:00
	72	05:20:00
	73	05:22:00
	74	05:24:00
	75	05:27:00	1
	76	05:28:00
	77	05:30:00
	78	05:33:00
	79	05:35:00
	80	05:38:00
	81	05:36:00
	82	05:34:00
	83	05:32:00
	84	05:28:00
2015-12-14	44	04:00:00
	45	04:02:00		1
	46	04:05:00		1
	47	04:07:00
	48	04:09:00
	49	04:11:00
	50	04:14:00		1
	51	04:16:00
	52	04:18:00
	53	04:20:00
	54	04:25:00
	55	04:29:00		1
	56	04:31:00
	57	04:34:00
	58	04:36:00
	58A	04:37:00
	59	04:39:00
	60	04:42:00
	61	04:44:00
	62	04:46:00
	63	04:48:00
	64	04:50:00
	65	04:53:00
	66	04:56:00
	67	04:58:00
	68	05:00:00
	69	05:03:00
	70	05:06:00
	71	05:09:00
	72	05:13:00
	73	05:16:00
	74	05:18:00
	75	05:16:00
	76	05:15:00
	77	05:13:00
	78	05:11:00
	79	05:08:00
	80	05:05:00		1
	81	05:03:00
	82	05:01:00		1
	83	04:59:00		1	1
	84	04:55:00	1
2015-12-15	44	04:41:00
	45	04:43:00
	46	04:45:00
	47	04:47:00
	48	04:49:00
	49	04:51:00
	50	04:53:00
	51	04:55:00
	52	04:57:00
	53	04:59:00
	54	05:01:00
	55	05:08:00
	56	05:11:00
	57	05:13:00
	58	05:16:00
	58A	05:16:00			1
	59	05:17:00
	60	05:20:00
	61	05:22:00			1
	62	05:27:00			1
	63	05:29:00
	64	05:31:00
	65	05:36:00
	66	05:37:00
	67	05:40:00
	68	05:43:00
	69	05:41:00
	70	05:39:00	1
	71	05:36:00
	72	05:34:00
	73	05:30:00
	74	05:28:00
	75	05:26:00
	76	05:24:00
	77	05:22:00
	78	05:20:00
	79	05:18:00
	80	05:16:00
	81	05:13:00
	82	05:10:00	1
	83	05:08:00
	84	05:05:00
2015-12-16	44	04:25:00
	45	04:28:00
	46	04:30:00
	47	04:34:00
	48	04:32:00
	49	04:34:00
	50	04:36:00
	51	04:38:00
	52	04:40:00
	53	04:42:00
	54	04:44:00
	55	04:46:00
	56	04:49:00
	57	04:53:00
	58	04:54:00
	58A	04:55:00
	59	04:57:00		1
	60	04:58:00
	61	05:01:00
	62	05:03:00
	63	05:06:00
	64	05:08:00
	65	05:09:00
	66	05:12:00
	67	05:15:00
	68	05:16:00
	69	05:19:00
	70	05:21:00
	71	05:23:00
	72	05:28:00
	73	05:24:00
	74	05:22:00
	75	05:20:00
	76	05:18:00
	77	05:17:00
	78	05:15:00
	79	05:13:00
	80	05:12:00
	81	05:11:00
	82	05:09:00
	83	05:04:00		1
	84	04:59:00
2015-12-17	44	05:10:00
	45	05:12:00
	46	05:14:00		1
	47	05:16:00
	48	05:17:00
	49	05:20:00
	50	05:22:00
	51	05:24:00
	52	05:25:00
	53	05:27:00		2
	54	05:29:00		1
	55	05:32:00
	56	05:35:00
	57	05:39:00
	58	05:41:00
	58A	05:42:00
	59	05:44:00
	60	05:46:00
	61	05:48:00
	62	05:50:00
	63	05:52:00
	64	05:54:00
	65	05:57:00	1
	66	05:59:00
	67	06:01:00
	68	06:03:00
	69	06:04:00
	70	06:02:00
	71	06:00:00
	72	05:58:00
	73	05:56:00
	74	05:54:00
	75	05:52:00		1
	76	05:50:00
	77	05:48:00
	78	05:46:00
	79	05:44:00
	80	05:42:00
	81	05:40:00
	82	05:38:00
	83	05:36:00
	84	05:34:00
2015-12-18	44	04:19:00
	45	04:22:00
	46	04:26:00
	47	04:28:00
	48	04:31:00
	49	04:33:00
	50	04:36:00
	51	04:38:00
	52	04:40:00
	53	04:42:00
	54	04:45:00
	55	04:48:00
	56	04:51:00
	57	04:54:00
	58	04:56:00		1
	58A	04:59:00
	59	05:01:00
	60	05:03:00
	61	05:06:00
	62	05:09:00
	63	05:11:00
	64	05:13:00
	65	05:16:00
	66	05:19:00
	67	05:21:00
	68	05:23:00
	69	05:26:00
	70	05:21:00
	71	05:19:00
	72	05:17:00
	73	05:15:00
	74	05:13:00
	75	05:11:00
	76	05:09:00
	77	05:07:00
	78	05:05:00
	79	05:03:00
	80	05:01:00
	81	04:59:00
	82	04:57:00
	83	04:55:00		1
	84	04:53:00
2015-12-19	44	03:56:00
	45	03:58:00
	46	04:01:00
	47	04:05:00
	48	04:07:00
	49	04:09:00
	50	04:11:00
	51	04:13:00
	52	04:15:00
	53	04:17:00
	54	04:19:00
	55	04:21:00
	56	04:24:00
	57	04:28:00
	58	04:30:00
	58A	04:31:00
	59	04:34:00
	60	04:36:00
	61	04:39:00
	62	04:41:00
	63	04:43:00
	64	04:46:00
	65	04:48:00
	66	04:50:00
	67	04:52:00
	68	04:54:00
	69	04:57:00			1
	70	04:59:00			1
	71	04:59:00
	72	04:57:00
	73	04:55:00
	74	04:53:00
	75	04:51:00		1
	76	04:49:00		1
	77	04:47:00
	78	04:45:00
	79	04:43:00
	80	04:41:00
	81	04:39:00
	82	04:37:00
	83	04:35:00		1
	84	04:33:00
2015-12-20	44	03:04:00
	45	03:07:00
	46	03:09:00		1
	47	03:11:00
	48	03:17:00		1
	49	03:21:00
	50	03:24:00
	51	03:27:00
	52	03:29:00	1
	53	03:32:00
	54	03:35:00
	55	03:43:00
	56	03:46:00
	57	03:48:00
	58	03:50:00
	58A	03:52:00
	59	03:53:00
	60	03:56:00
	61	03:58:00
	62	04:00:00
	63	04:02:00
	64	04:04:00
	65	04:10:00
	66	04:13:00
	67	04:15:00
	68	04:18:00
	69	04:20:00
	70	04:22:00
	71	04:24:00
	72	04:26:00
	73	04:28:00
	74	04:33:00
	75	04:31:00
	76	04:29:00		1
	77	04:27:00
	78	04:25:00
	79	04:23:00
	80	04:21:00
	81	04:19:00		1
	82	04:17:00
	83	04:15:00
	84	04:13:00
2015-12-21	44	04:04:00
	45
	46
	47
	48
	49
	50
	51
	52
	53
	54
	55
	56
	57
	58
	58A
	59
	60
	61
	62
	63
	64
	65			1
	66
	67
	68
	69
	70
	71
	72
	73
	74
	75
	76
	77
	78	05:26:00
	79	05:24:00
	80	05:22:00
	81	05:20:00
	82	05:18:00
	83	05:16:00
	84	05:14:00
2015-12-22	44	03:46:00
	45	03:48:00
	46	03:51:00
	47	03:53:00
	48	03:56:00
	49	03:58:00
	50	04:01:00
	51	04:03:00
	52	04:08:00
	53	04:10:00		1
	54	04:14:00
	55	04:17:00
	56	04:20:00
	57	04:22:00
	58	04:24:00
	58A	04:27:00
	59	04:28:00
	60	04:32:00
	61	04:36:00
	62	04:39:00
	63	04:41:00
	64	04:44:00			1
	65	04:47:00		1
	66	04:52:00
	67	04:54:00
	68	04:57:00
	69	04:59:00
	70	05:02:00
	71	05:03:00
	72	05:12:00
	73	05:10:00
	74	05:08:00
	75	05:06:00
	76	05:04:00
	77	05:02:00
	78	05:00:00
	79	04:58:00
	80	04:56:00
	81	04:54:00
	82	04:52:00
	83	04:50:00
	84	04:48:00		1
2015-12-23	44	04:41:00
	45	04:45:00
	46	04:47:00
	47	04:50:00
	48	04:52:00
	49	04:54:00
	50	04:56:00
	51	04:59:00
	52	05:01:00
	53	05:03:00		1
	54	05:06:00
	55	05:11:00
	56	05:13:00
	57	05:18:00
	58	05:20:00	1
	58A	05:23:00
	59	05:24:00		1
	60	05:30:00
	61	05:32:00
	62	05:35:00
	63	05:39:00
	64	05:41:00
	65	05:45:00
	66	05:48:00
	67	05:47:00
	68	05:45:00
	69	05:43:00
	70	05:41:00
	71	05:39:00
	72	05:37:00
	73	05:35:00
	74	05:33:00
	75	05:31:00
	76	05:29:00
	77	05:27:00
	78	05:25:00
	79	05:23:00
	80	05:21:00
	81	05:19:00
	82	05:17:00
	83	05:15:00
	84	05:13:00
2015-12-24	44	04:46:00
	45	04:49:00
	46	04:53:00
	47	04:55:00
	48	04:57:00
	49	04:59:00
	50	05:01:00		1
	51	05:03:00
	52	05:05:00
	53	05:07:00		2
	54	05:09:00
	55	05:11:00
	56	05:14:00
	57	05:16:00
	58	05:18:00	1
	58A	05:20:00
	59	05:21:00
	60	05:26:00
	61	05:29:00
	62	05:35:00		1
	63	05:37:00
	64	05:39:00
	65	05:44:00
	66	05:47:00
	67	05:48:00	1
	68	05:51:00
	69	05:54:00
	70	05:59:00
	71	06:03:00
	72	06:01:00
	73	05:59:00
	74	05:57:00
	75	05:55:00			1wallaby
	76	05:53:00			1wallaby
	77	05:51:00
	78	05:49:00
	79	05:47:00
	80	05:45:00
	81	05:43:00
	82	05:41:00
	83	05:39:00
	84	05:37:00
2015-12-25	44	04:41:00
	45	04:43:00
	46	04:49:00
	47	04:51:00
	48	04:53:00
	49	04:53:00
	50	04:56:00
	51	04:58:00
	52	05:00:00
	53	05:02:00
	54	05:04:00
	55	05:07:00
	56	05:09:00
	57	05:11:00
	58	05:12:00
	58A	05:14:00
	59	05:15:00
	60	05:16:00
	61	05:21:00
	62	05:24:00
	63	05:26:00
	64	05:27:00
	65	05:30:00
	66	05:34:00
	67	05:35:00
	68	05:38:00
	69	05:40:00
	70	05:35:00
	71	05:33:00
	72	05:31:00
	73	05:29:00
	74	05:27:00
	75	05:25:00
	76	05:23:00
	77	05:21:00		1
	78	05:19:00
	79	05:17:00
	80	05:15:00		1
	81	05:13:00
	82	05:11:00
	83	05:09:00
	84	05:07:00		1
2015-12-26	44	04:15:00
	45	04:17:00
	46	04:19:00
	47	04:21:00
	48	04:24:00		1
	49	04:26:00
	50	04:28:00
	51	04:30:00
	52	04:33:00
	53	04:35:00
	54	04:38:00
	55	04:40:00
	56	04:43:00
	57	04:46:00
	58	04:48:00		1
	58A	04:51:00
	59	04:52:00
	60	04:55:00
	61	04:57:00
	62	05:00:00
	63	05:02:00
	64	05:04:00			1
	65	05:07:00	1
	66	05:13:00		1
	67	05:15:00		2
	68	05:26:00
	69	05:24:00
	70	05:22:00
	71	05:20:00
	72	05:18:00
	73	05:16:00
	74	05:14:00		1
	75	05:12:00
	76	05:10:00
	77	05:08:00
	78	05:06:00
	79	05:04:00
	80	05:02:00
	81	05:00:00
	82	04:58:00
	83	04:56:00
	84	04:54:00
2015-12-28	44	04:34:00		1
	45	04:37:00
	46	04:39:00
	47	04:41:00
	48	04:43:00
	49	04:45:00
	50	04:48:00
	51	04:52:00
	52	04:54:00
	53	04:56:00
	54	04:58:00
	55	05:00:00
	56	05:03:00
	57	05:10:00
	58	05:12:00
	58A	05:14:00
	59	05:15:00
	60	05:23:00
	61	05:25:00		1
	62	05:28:00
	63	05:30:00
	64	05:32:00
	65	05:48:00
	66	05:46:00
	67	05:44:00
	68	05:42:00
	69	05:40:00
	70	05:38:00
	71	05:36:00
	72	05:34:00
	73	05:32:00
	74	05:30:00
	75	05:28:00
	76	05:26:00
	77	05:24:00
	78	05:22:00
	79	05:20:00
	80	05:18:00
	81	05:16:00
	82	05:14:00
	83	05:12:00
	84	05:10:00
2015-12-29	44	03:44:00
	45	03:45:00
	46	03:47:00
	47	03:49:00
	48	03:50:00
	49	03:52:00
	50	03:55:00
	51	03:57:00
	52	03:58:00
	53	04:00:00
	54	04:04:00
	55	04:06:00
	56	04:09:00
	57	04:10:00
	58	04:11:00
	58A	04:11:00
	59	04:12:00
	60	04:15:00
	61	04:17:00
	62	04:19:00
	63	04:20:00
	64	04:22:00
	65	04:24:00	1
	66	04:27:00
	67	04:29:00
	68	04:38:00
	69	04:45:00
	70	04:43:00
	71	04:41:00
	72	04:39:00
	73	04:37:00
	74	04:35:00
	75	04:33:00		1
	76	04:31:00
	77	04:29:00
	78	04:27:00
	79	04:25:00
	80	04:23:00
	81	04:21:00
	82	04:19:00
	83	04:17:00
	84	04:15:00		1
2015-12-30	44	03:48:00
	45	03:50:00
	46	03:53:00
	47	03:54:00
	48	03:55:00
	49	03:57:00
	50	03:59:00
	51	04:00:00
	52	04:02:00
	53	04:05:00		1
	54	04:14:00
	55	04:17:00
	56	04:18:00
	57	04:19:00
	58	04:21:00
	58A	04:21:00
	59	04:24:00
	60	04:26:00
	61	04:29:00
	62	04:30:00
	63	04:35:00
	64	04:38:00
	65	04:40:00
	66	04:42:00	1
	67	04:44:00	1
	68	04:45:00
	69	04:47:00
	70	04:49:00
	71	04:51:00
	72	04:49:00
	73	04:47:00
	74	04:45:00		1
	75	04:43:00
	76	04:41:00
	77	04:39:00
	78	04:37:00
	79	04:35:00
	80	04:33:00
	81	04:31:00		1
	82	04:29:00
	83	04:27:00
	84	04:25:00
2015-12-30	44	03:38:00		1
	45	03:40:00
	46	03:42:00		1
	47	03:44:00
	48	03:45:00
	49	03:46:00
	50	03:49:00
	51	03:50:00
	52	03:51:00
	53	03:53:00	1
	54	03:55:00		1
	55	03:57:00
	56	04:00:00
	57	04:02:00
	58	04:03:00
	58A	04:05:00
	59	04:05:00
	60	04:07:00
	61	04:09:00
	62	04:10:00
	63	04:12:00
	64	04:14:00
	65	04:14:00
	66	04:16:00
	67	04:20:00
	68	04:21:00
	69	04:24:00
	70	04:26:00
	71	04:29:00
	72	04:31:00
	73	04:38:00
	74	04:36:00
	75	04:34:00		1
	76	04:32:00
	77	04:30:00
	78	04:28:00
	79	04:26:00
	80	04:24:00
	81	04:22:00
	82	04:20:00
	83	04:18:00
	84	04:16:00
2016-01-01	44	03:40:00		1
	45	03:42:00
	46	03:46:00
	47	03:47:00
	48	03:50:00	1
	49	03:52:00
	50	03:54:00
	51	03:56:00
	52	03:58:00
	53	04:01:00		1
	54	04:03:00
	55	04:06:00
	56	04:08:00
	57	04:10:00
	58	04:12:00
	58A	04:12:00
	59	04:13:00
	60	04:15:00
	61	04:17:00
	62	04:20:00
	63	04:22:00
	64	04:24:00
	65	04:27:00	1
	66	04:42:00
	67	04:40:00
	68	04:38:00			1
	69	04:36:00
	70	04:34:00
	71	04:32:00
	72	04:30:00
	73	04:28:00
	74	04:26:00	1
	75	04:24:00
	76	04:22:00	1
	77	04:20:00	1
	78	04:18:00
	79	04:16:00
	80	04:14:00
	81	04:12:00
	82	04:10:00
	83	04:08:00
	84	04:06:00		1
2016-01-02	44	03:38:00
	45	03:42:00
	46	03:44:00
	47	03:45:00
	48	03:47:00
	49	03:50:00
	50	03:53:00
	51	03:58:00
	52	03:58:00
	53	04:00:00			1
	54	04:02:00
	55	04:07:00
	56	04:12:00
	57	04:14:00
	58	04:16:00
	58A	04:18:00
	59	04:19:00
	60	04:22:00
	61	04:24:00
	62	04:27:00
	63	04:29:00
	64	04:29:00
	65	04:31:00
	66	04:34:00
	67	04:37:00
	68	04:39:00
	69	04:41:00
	70	04:43:00			1
	71	04:46:00
	72	04:56:00
	73	04:58:00
	74	05:08:00			1
	75	05:06:00
	76	05:04:00
	77	05:02:00
	78	05:00:00
	79	04:58:00
	80	04:56:00		1
	81	04:54:00
	82	04:52:00		1
	83	04:50:00
	84	04:48:00	1
2016-01-03	44	04:35:00
	45	04:38:00
	46	04:39:00
	47	04:41:00
	48	04:43:00
	49	04:45:00
	50	04:47:00
	51	04:49:00
	52	04:51:00
	53	04:53:00
	54	04:55:00
	55	04:57:00
	56	04:59:00
	57	05:01:00
	58	05:03:00
	58A	05:05:00
	59	05:06:00
	60	05:08:00
	61	05:10:00
	62	05:12:00
	63	05:14:00
	64	05:16:00
	65	05:18:00	1
	66	05:22:00		1
	67	05:23:00
	68	05:27:00
	69	05:25:00
	70	05:23:00
	71	05:21:00
	72	05:19:00		1
	73	05:17:00
	74	05:15:00
	75	05:13:00
	76	05:11:00
	77	05:09:00
	78	05:07:00
	79	05:05:00
	80	05:03:00
	81	05:01:00
	82	04:59:00
	83	04:57:00
	84	04:55:00
2016-01-05	44	03:44:00	1
	45	03:46:00
	46	03:47:00	1		1
	47	03:49:00
	48	03:51:00
	49	03:52:00
	50	03:54:00		1
	51	03:57:00	1
	52	03:59:00
	53	04:00:00
	54	04:02:00
	55	04:03:00		1
	56	04:06:00
	57	04:07:00
	58	04:07:00
	58A	04:10:00
	59	06:13:00
	60	06:11:00
	61	06:09:00
	62	06:07:00
	63	06:05:00
	64	06:03:00
	65	06:01:00
	66	05:59:00
	67	05:57:00
	68	05:55:00		1
	69	05:53:00
	70	05:51:00
	71	05:49:00
	72	05:47:00
	73	05:45:00	1
	74	05:43:00
	75	05:41:00
	76	05:39:00
	77	05:37:00
	78	05:35:00
	79	05:35:00
	80	05:33:00		1
	81	05:31:00
	82	05:29:00
	83	05:27:00
	84	05:25:00
2016-01-06	44	03:40:00		1
	45	03:42:00
	46	03:44:00	1	1
	47	03:47:00
	48	03:48:00
	49	03:51:00
	50	03:53:00
	51	03:55:00
	52	03:58:00
	53	04:01:00
	54	04:04:00
	55	04:09:00
	56	04:11:00
	57	04:13:00
	58	04:16:00
	58A	04:17:00
	59	04:19:00
	60	04:21:00
	61	04:23:00
	62	04:25:00
	63	04:28:00
	64	04:29:00
	65	04:32:00
	66	04:35:00	1
	67	04:37:00
	68	04:39:00
	69	04:41:00
	70	04:44:00
	71
	72	04:51:00
	73	04:49:00
	74	04:47:00
	75	04:45:00
	76	04:43:00
	77	04:41:00
	78	04:39:00		1
	79	04:37:00
	80	04:35:00		1
	81	04:33:00		1
	82	04:31:00
	83	04:29:00
	84	04:27:00		1
2016-01-06	44	03:40:00		1
	45	03:42:00
	46	03:44:00	1	1
	47	03:47:00
	48	03:48:00
	49	03:51:00
	50	03:53:00
	51	03:55:00
	52	03:58:00
	53	04:01:00
	54	04:04:00
	55	04:09:00
	56	04:11:00
	57	04:13:00
	58	04:16:00
	58A	04:17:00
	59	04:19:00
	60	04:21:00
	61	04:23:00
	62	04:25:00
	63	04:28:00
	64	04:29:00
	65	04:32:00
	66	04:35:00	1
	67	04:37:00
	68	04:39:00
	69	04:41:00
	70	04:44:00
	71
	72	04:51:00
	73	04:49:00
	74	04:47:00
	75	04:45:00
	76	04:43:00
	77	04:41:00
	78	04:39:00		1
	79	04:37:00
	80	04:35:00		1
	81	04:33:00		1
	82	04:31:00
	83	04:29:00
	84	04:27:00		1
2016-01-07	44	04:23:00
	45	04:26:00
	46	04:28:00		1
	47	04:30:00
	48	04:32:00
	49	04:38:00
	50	04:40:00	1
	51	04:43:00		1
	52	04:45:00
	53	04:48:00
	54	04:50:00
	55	04:54:00
	56	04:57:00
	57	04:59:00
	58	05:01:00
	58A	05:03:00
	59	05:04:00
	60	05:07:00
	61	05:09:00
	62	05:11:00
	63	05:13:00
	64	05:15:00
	65	05:18:00
	66	05:31:00	1
	67	05:29:00
	68	05:27:00
	69	05:25:00
	70	05:23:00
	71	05:21:00
	72	05:19:00
	73	05:17:00
	74	05:15:00
	75	05:13:00
	76	05:11:00	1
	77	05:09:00
	78	05:07:00	1
	79	05:05:00
	80	05:03:00		1
	81	05:01:00		1
	82	04:59:00
	83	04:57:00
	84	04:55:00	1
2016-01-08	44	03:36:00
	45	03:38:00
	46	03:40:00
	47	03:42:00		1
	48	03:44:00
	49	03:46:00
	50	03:48:00		1
	51	03:51:00		1
	52	03:54:00
	53	03:56:00		1
	54	03:58:00
	55	04:00:00
	56	04:02:00
	57	04:04:00
	58	04:06:00
	58A	04:08:00
	59	04:09:00
	60	04:12:00
	61	04:14:00
	62	04:16:00
	63	04:19:00			1
	64	04:21:00
	65	04:26:00		1
	66	04:29:00
	67	04:30:00
	68	04:32:00
	69	04:34:00
	70	04:36:00
	71	04:48:00
	72	04:46:00
	73	04:44:00	1
	74	04:42:00		1
	75	04:40:00
	76	04:38:00
	77	04:36:00
	78	04:34:00
	79	04:32:00
	80	04:30:00		1
	81	04:28:00
	82	04:26:00
	83	04:24:00
	84	04:22:00
2016-01-10	44	03:22:00		1
	45
	46		1
	47
	48			1
	49		1
	50			2
	51			1
	52
	53
	54			1
	55			1
	56
	57		1
	58			1
	58A
	59
	60
	61
	62
	63
	64
	65
	66
	67
	68
	69
	70
	71
	72
	73
	74
	75			1
	76		1
	77	05:01:00
	78	04:59:00		1
	79	04:57:00
	80	04:55:00	1
	81	04:53:00
	82	04:51:00
	83	04:49:00
	84	04:47:00		1
2016-01-11	44	03:47:00
	45	03:51:00			1
	46	03:54:00
	47	03:56:00
	48	03:58:00
	49	04:00:00
	50	04:04:00		1
	51	04:06:00
	52	04:08:00
	53	04:10:00
	54	04:14:00			2
	55	04:15:00
	56	04:19:00			1
	57	04:22:00
	58	04:24:00
	58A	04:27:00
	59	04:30:00
	60	04:33:00		1
	61	04:38:00
	62	04:41:00
	63	04:44:00
	64	04:47:00
	65	04:49:00
	66	04:54:00	3
	67	04:56:00		1
	68	04:59:00
	69	05:01:00	1
	70	05:03:00	1
	71	05:05:00
	72	05:07:00
	73	05:05:00	1
	74	05:03:00			1
	75	05:01:00
	76	04:59:00
	77	04:57:00
	78	04:55:00
	79	04:53:00
	80	04:51:00
	81	04:49:00			1
	82	04:47:00
	83	04:45:00
	84	04:43:00
2016-01-12	44	03:43:00
	45	03:45:00
	46	03:47:00
	47	03:49:00
	48	03:51:00
	49	03:54:00
	50	03:55:00
	51	03:57:00		2
	52	04:00:00
	53	04:02:00
	54	04:07:00
	55	04:09:00
	56	04:12:00
	57	04:15:00	1
	58	04:17:00
	58A	04:21:00
	59	04:24:00	1
	60	04:29:00
	61	04:33:00			1
	62	04:37:00		1
	63	04:42:00
	64	04:45:00
	65	04:45:00
	66	04:52:00
	67	04:53:00
	68	04:57:00
	69	05:00:00
	70	05:02:00
	71	05:05:00		1
	72	05:03:00
	73	05:01:00
	74	04:59:00
	75	04:57:00
	76	04:55:00
	77	04:53:00
	78	04:51:00
	79	04:49:00
	80	04:47:00
	81	04:45:00
	82	04:43:00
	83	04:41:00			1
	84	04:39:00
2016-01-13	44	03:47:00
	45	03:50:00
	46	03:53:00
	47	03:55:00
	48	03:58:00
	49	04:01:00
	50	04:03:00		1
	51	04:06:00	2
	52	04:08:00
	53	04:11:00
	54	04:14:00		1
	55	04:17:00		1
	56	04:23:00
	57	04:26:00
	58	04:28:00	1
	58A	04:31:00
	59	04:32:00
	60	04:37:00
	61	04:42:00
	62	04:46:00
	63	04:51:00
	64	04:53:00
	65	03:35:00
	66	03:38:00	1
	67	03:40:00
	68	03:43:00
	69	03:47:00
	70	03:49:00
	71	03:52:00
	72	03:54:00
	73	03:57:00
	74	03:59:00
	75	04:03:00
	76	04:08:00
	77	04:11:00
	78	04:13:00
	79	04:16:00
	80	04:18:00			1
	81	04:23:00
	82	04:21:00
	83	04:19:00
	84	04:17:00
2016-01-14	44	03:40:00
	45	03:42:00
	46	03:44:00
	47	03:47:00
	48	03:49:00
	49	03:51:00
	50	03:53:00	1
	51	03:55:00
	52	03:57:00
	53	03:59:00
	54	04:02:00
	55	04:08:00			1
	56	04:11:00
	57	04:14:00	1		1
	58	04:16:00		1	1
	58A	04:17:00
	59	04:17:00
	60	04:19:00
	61	04:21:00
	62	04:24:00		1
	63	04:22:00			1
	64	04:28:00
	65	03:37:00
	66	03:40:00
	67	03:42:00
	68	03:44:00
	69	03:47:00			1
	70	03:50:00
	71	03:52:00
	72	03:55:00
	73	03:58:00
	74	04:03:00
	75	04:09:00
	76	04:11:00
	77	04:13:00		1
	78	04:16:00			1
	79	04:19:00
	80	04:22:00
	81	04:24:00
	82	04:27:00			1
	83	04:28:00
	84	04:26:00
2016-01-15	44	03:38:00
	45	03:40:00
	46	03:43:00
	47	03:44:00
	48	03:47:00
	49	03:49:00
	50	03:51:00
	51	03:51:00	1	1
	52	03:56:00
	53	03:58:00
	54	04:00:00
	55	04:02:00
	56	04:07:00
	57	04:10:00
	58	04:13:00
	58A	04:15:00			1
	59	04:16:00
	60	04:19:00	1
	61	04:21:00
	62	04:24:00
	63	04:26:00
	64	04:29:00	1
	65	04:31:00
	66	04:35:00
	67	04:37:00
	68	04:39:00
	69	04:44:00
	70	04:42:00
	71	04:40:00
	72	04:38:00
	73	04:36:00
	74	04:34:00
	75	04:32:00
	76	04:30:00
	77	04:28:00
	78	04:26:00		1
	79	04:24:00
	80	04:22:00
	81	04:20:00
	82	04:18:00
	83	04:16:00
	84	04:14:00	1
2016-01-17	44	03:40:00
	45	03:42:00
	46	03:44:00		2
	47	04:46:00
	48	03:48:00
	49	03:50:00
	50	03:51:00
	51	03:52:00
	52	03:54:00	1
	53	03:56:00
	54	03:58:00
	55	04:01:00
	56	04:03:00
	57	04:06:00		1
	58	04:08:00		1
	58A	04:10:00
	59	04:11:00
	60	04:13:00
	61	04:15:00
	62	04:17:00
	63	04:19:00
	64	04:21:00
	65	04:23:00
	66	04:26:00
	67	04:28:00
	68	04:30:00
	69	04:32:00		1
	70	04:34:00
	71	04:36:00
	72	04:50:00
	73	04:48:00
	74	04:46:00		1
	75	04:44:00
	76	04:42:00
	77	04:40:00
	78	04:38:00
	79	04:36:00
	80	04:34:00
	81	04:32:00
	82	04:30:00
	83	04:28:00
	84	04:26:00
2016-01-18	44	03:39:00
	45	03:41:00
	46	03:43:00
	47	03:45:00			1
	48	03:53:00
	49	03:55:00
	50	03:57:00
	51	03:59:00
	52	04:03:00		1
	53	04:05:00
	54	04:07:00		1
	55	04:09:00
	56	04:11:00
	57	04:13:00
	58	04:15:00
	58A	04:16:00
	59	04:18:00
	60	04:20:00
	61	04:22:00
	62	04:24:00		1	1
	63	04:26:00
	64	04:28:00
	65	04:30:00		1
	66	04:32:00		2
	67	04:34:00
	68	04:40:00
	69	04:38:00
	70	04:36:00
	71	04:34:00
	72	04:32:00
	73	04:30:00
	74	04:28:00
	75	04:26:00		1
	76	04:24:00
	77	04:22:00
	78	04:20:00		1
	79	04:18:00		1
	80	04:16:00
	81	04:14:00
	82	04:12:00
	83	04:10:00
	84	04:08:00	1
2016-01-19	44	03:36:00
	45	03:38:00
	46	03:40:00		1
	47	03:42:00
	48	03:44:00
	49	03:46:00
	50	03:49:00
	51	03:51:00
	52	03:53:00
	53	03:55:00
	54	03:57:00
	55	04:00:00			1
	56	04:03:00
	57	04:06:00
	58	04:08:00
	58A	04:10:00
	59	04:12:00
	60	04:14:00
	61	04:16:00
	62	04:18:00			1
	63	04:20:00
	64	04:22:00	1
	65	04:25:00
	66	04:32:00	1
	67	04:30:00
	68	04:28:00
	69	04:26:00
	70	04:24:00
	71	04:22:00
	72	04:20:00
	73	04:18:00		1
	74	04:16:00
	75	04:14:00
	76	04:12:00
	77	04:10:00
	78	04:08:00
	79	04:06:00
	80	04:04:00		1
	81	04:02:00
	82	04:00:00
	83	03:58:00
	84	03:56:00
2016-01-20	44	03:36:00
	45	03:38:00
	46	03:40:00
	47	03:42:00
	48	03:44:00
	49	03:46:00
	50	03:48:00	2		1
	51	03:50:00	1
	52	03:52:00
	53	03:55:00
	54	03:57:00
	55	04:00:00
	56	04:03:00
	57	04:05:00
	58	04:07:00
	58A	04:09:00
	59	04:10:00
	60	04:12:00
	61	04:14:00
	62	04:16:00
	63	04:18:00
	64	04:20:00
	65	04:23:00			1
[truncated: 1,489 more rows]
